# Supplementary material for: Clinical proof of concept for anti-FGF2 therapy in exudative age-related macular degeneration (nAMD): phase 2 trials in treatment-naïve and anti-VEGF pretreated patients
Source: PubMed Central journal article supplement (PMC11009322; doi:10.1038/s41433-023-02848-7), 2023-11-30
Supplement: 41433_2023_2848_MOESM1_ESM.pdf [file 41433_2023_2848_MOESM1_ESM.pdf]

## SUPPLEMENTARY MATERIALS

**Supplementary Fig. 1. Post-hoc analysis of the TOFU dataset selecting a short history of treatment of less than 2 years.** Bar graph showing the primary efficacy end point, mean change in visual acuity (VA) from baseline to week 16. Data from the post-hoc analysis is depicted. Error bars represent standard error.

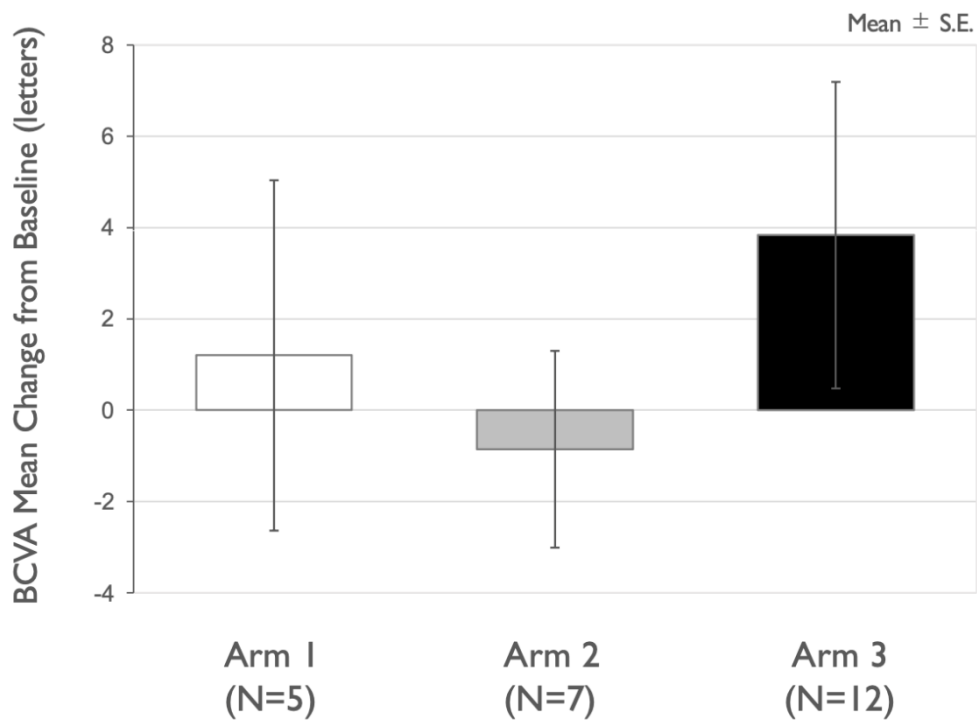

**Supplementary Fig. 2. The primary and secondary endpoint dataset in the RAMEN study.** Changes in BCVA (vision, **a**) and CST (macular anatomy, **b**) during extended UMEDAPTANIB PEGOL injections in each Arm populations are shown. Twenty subjects were rolled-over from Arm 1 (seven subjects), Arm 2 (five subjects) and Arm3 (eight subjects) and received four monthly intravitreal injections of UMEDAPTANIB PEGOL. Error bars represent standard errors.

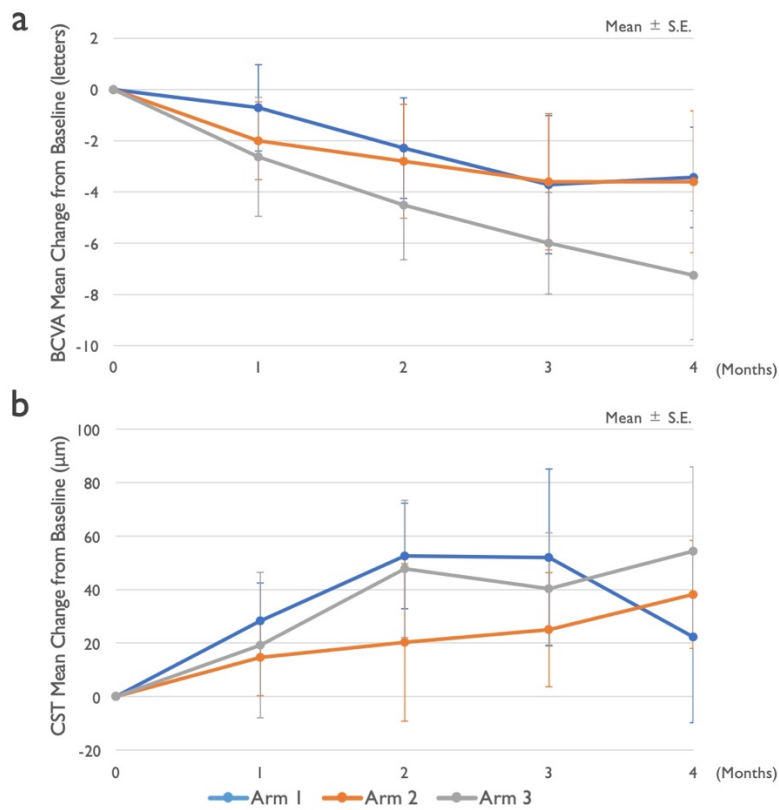

**Supplementary Table 1. Number of subjects who met rescue therapy criteria by visit in the TOFU study (Full Analysis Set).**

| Visit   | Arm 1<br>(N=29) |      | Arm 2<br>(N=28) |      | Arm 3<br>(N=29) |      |
|---------|-----------------|------|-----------------|------|-----------------|------|
|         | n               | %    | n               | %    | n               | %    |
| Week 1  | 0               | 0    | 0               | 0    | 0               | 0    |
| Week 4  | 0               | 0    | 0               | 0    | 1               | 3.4  |
| Week 8  | 2               | 6.9  | 0               | 0    | 2               | 7.1  |
| Week 12 | 7               | 24.1 | 0               | 0    | 0               | 0    |
| Week 16 | 3               | 10.3 | 5               | 17.9 | 4               | 14.3 |
| Week 20 | 16              | 55.2 | 5               | 17.9 | 8               | 29.6 |

**Supplementary Table 2. Summary of ocular treatment emergent serious adverse events (TESAEs) in the TOFU study.**

|                                                | <b>Arm 1</b>  |     | <b>Arm 2</b>  |     | <b>Arm 3</b>  |     |
|------------------------------------------------|---------------|-----|---------------|-----|---------------|-----|
|                                                | <b>(N=28)</b> |     | <b>(N=29)</b> |     | <b>(N=29)</b> |     |
|                                                | n             | %   | n             | %   | n             | %   |
| Subjects with at least one ocular TESAE        | 2             | 7.1 | 2             | 6.9 | 1             | 3.4 |
| Eye disorders                                  | 2             | 7.1 | 1             | 3.4 | 1             | 3.4 |
| - Iritis                                       | 2             | 7.1 | 1             | 3.4 | 0             | 0   |
| - Vitritis                                     | 2             | 7.1 | 1             | 3.4 | 0             | 0   |
| - Eye pain                                     | 1             | 3.6 | 0             | 0   | 0             | 0   |
| - Neovascular age-related macular degeneration | 0             | 0   | 0             | 0   | 1             | 3.4 |
| - Vision blurred                               | 0             | 0   | 1             | 3.4 | 0             | 0   |
| Infections and infestations                    |               |     |               |     |               |     |
| - Endophthalmitis                              | 0             | 0   | 1             | 3.4 | 0             | 0   |

Note: A treatment-emergent adverse event (TEAE) is defined as an adverse event that occurred or worsened following the first administration of the study drug. If a subject has multiple occurrences of a serious TEAE, the subject is presented only once in the subject count(n) column.

**Supplementary Table 3. Summary of ocular treatment emergent adverse events (TEAEs) in the RAMEN study.**

|                                                                        | n | RAMEN<br>(N=22)<br>% | E  |
|------------------------------------------------------------------------|---|----------------------|----|
| Subjects with at least one TEAE                                        | 6 | 27.3                 | 19 |
| Subjects with at least one Ocular TEAE                                 | 5 | 22.7                 | 8  |
| - Study Eye                                                            | 4 | 18.2                 | 7  |
| - Non-study Eye                                                        | 1 | 4.5                  | 1  |
| Subjects with at least one Non-ocular TEAE                             | 2 | 9.1                  | 11 |
| Subjects with at least one TEAE Related to Study Drug                  | 0 |                      | 0  |
| Subjects with at least one TEAE Related to Injection Procedure         | 2 | 9.1                  | 5  |
| Subjects with at least one serious TEAE                                | 1 | 4.5                  | 1  |
| Subjects with at least one serious TEAE related to Study Drug          | 0 |                      | 0  |
| Subjects with at least one serious TEAE related to Injection Procedure | 0 |                      | 0  |
| Subjects with a TEAE leading to premature discontinuation              | 0 |                      | 0  |
| Subjects with a TEAE leading to death                                  | 0 |                      | 0  |
